# Supplementary material
Source: Research Square preprint supplement (doi:10.21203/rs.3.rs-9579821/v1)
Supplement: Supplementary file 1 [file 9ac9e18fca3ddfff72ab0b08.xlsx]

## Sheet: Supplementary Table S1
Supplementary Table S1. Summary of multi-environment oat yield trial experiments by year and trial type (2020-2022)
Year	Trial Type	No. Experiments	Unique Lines	Locations	Replications per Location
2020	AYT	4	200	Carrington, Casselton, Fargo, Minot	3
	PYT	4	325	Casselton, Fargo	2
2021	AYT	4	229	Carrington, Casselton, Fargo, Minot	3
	PYT	3	292	Casselton, Fargo	2
2022	AYT	3	104	Carrington, Casselton, Fargo, Minot	3
	PYT	6	606	Carrington, Casselton, Fargo, Minot	2
AYT = Advanced Yield Trial; PYT = Preliminary Yield Trial. Unique Lines = number of distinct genotypes entered per trial type per year (deduplicated). All trials conducted at research stations in North Dakota, USA.
