# Supplementary material
Source: Research Square preprint supplement (doi:10.21203/rs.3.rs-9579821/v1)
Supplement: Supplementary file 1 [file f3216c2882f15306b257946c.docx]

**Table 1.** Phenotypic variation of agronomic, quality, mineral, and heavy-metal traits evaluated in 1,399 oat genotypes across 2020–2022.

| **Category** | **Trait** | **Unit** | **Years** | **N** | **Mean** | **SD** | **Min** | **Max** | **H²** |
| --- | --- | --- | --- | --- | --- | --- | --- | --- | --- |
| **Agronomic** | Heading date | days | 2020–2022 | 1,399 | 32 | 7 | 15 | 49 | 0.69 |
|  | Plant height | cm | 2020–2022 | 1,399 | 91 | 9 | 42 | 118 | 0.86 |
|  | Grain yield | kg ha-1 | 2020–2022 | 1,399 | 3,605 | 662 | 1,182 | 5,411 | 0.62 |
|  | Test weight | kg hL-1 | 2020–2022 | 1,399 | 48.8 | 2.8 | 38.7 | 60.5 | 0.79 |
|  | Plump kernels | kg ha-1 | 2020–2022 | 1,399 | 3,160 | 729 | 140 | 5,145 | 0.68 |
|  | Thin kernels | % | 2020–2022 | 1,399 | 13.1 | 12.7 | 1.7 | 95.7 | 0.92 |
| **Quality** | β-glucan | % | 2020–2022 | 1,393 | 5.05 | 0.44 | 3.8 | 6.4 | 0.63 |
|  | Oil | % | 2020–2022 | 1,393 | 5.81 | 0.79 | 3.1 | 9.7 | 0.74 |
|  | Protein | % | 2020–2022 | 1,393 | 18.3 | 1.3 | 13.5 | 23.1 | 0.53 |
| **Mineral** | Calcium (Ca) | mg kg-1 | 2020–2022 | 778 | 431 | 83 | 185 | 695 | 0.54 |
|  | Cobalt (Co) | mg kg-1 | 2020–2022 | 778 | 0.009 | 0.006 | 0.00 | 0.043 | 0.07 |
|  | Copper (Cu) | mg kg-1 | 2020–2022 | 778 | 6.74 | 0.90 | 4.09 | 10.4 | 0.52 |
|  | Iron (Fe) | mg kg-1 | 2020–2022 | 778 | 44.5 | 7.0 | 28.7 | 76.3 | 0.29 |
|  | Potassium (K) | mg kg-1 | 2020–2022 | 778 | 2,926 | 563 | 1,778 | 5,360 | 0.23 |
|  | Magnesium (Mg) | mg kg-1 | 2020–2022 | 778 | 1,743 | 143 | 1,398 | 2,304 | 0.14 |
|  | Manganese (Mn) | mg kg-1 | 2020–2022 | 778 | 44.4 | 7.7 | 29.2 | 70.3 | 0.37 |
|  | Molybdenum (Mo) | mg kg-1 | 2020–2022 | 778 | 2.39 | 0.82 | 0.70 | 5.87 | 0.49 |
|  | Sodium (Na) | mg kg-1 | 2020–2022 | 778 | 33 | 10 | 11 | 86 | 0.43 |
|  | Phosphorus (P) | mg kg-1 | 2020–2022 | 778 | 4,813 | 380 | 3,843 | 5,846 | 0.36 |
|  | Sulfur (S) | mg kg-1 | 2020–2022 | 778 | 2,033 | 133 | 1,671 | 2,671 | 0.49 |
|  | Selenium (Se) | mg kg-1 | 2020–2022 | 778 | 0.399 | 0.246 | 0.006 | 1.526 | 0.07 |
|  | Zinc (Zn) | mg kg-1 | 2020–2022 | 778 | 25.3 | 5.3 | 12.5 | 42.1 | 0.23 |
| **Heavy Metal** | Aluminum (Al) | mg kg-1 | 2020–2022 | 778 | 0.576 | 0.429 | 0.00 | 4.531 | 0.00† |
|  | Arsenic (As) | mg kg-1 | 2020–2022 | 778 | 0.214 | 0.086 | 0.046 | 0.469 | 0.17 |
|  | Cadmium (Cd) | mg kg-1 | 2020–2022 | 778 | 0.059 | 0.121 | 0.017 | 3.349 | 0.99 |
|  | Chromium (Cr) | mg kg-1 | 2020–2022 | 778 | 0.350 | 0.125 | 0.202 | 2.252 | 0.02 |
|  | Nickel (Ni) | mg kg-1 | 2020–2022 | 778 | 6.80 | 1.50 | 3.18 | 12.61 | 0.45 |
|  | Lead (Pb) | mg kg-1 | 2020–2022 | 778 | 0.036 | 0.028 | 0.00 | 0.303 | 0.00† |

*† Singular model fit; genotypic variance estimated as zero, indicating that trait variation is predominantly environmental.*

*H² = broad-sense heritability estimated across environments. N = number of genotypes with phenotypic data.*

**Table 2.** Stable marker-trait associations (MTAs) identified across multiple analyses.

| **Chr** | **SNP ID** | **Position (bp)** | **Associated Traits** | **-log₁₀P** | **Stab.** | **Analyses Detected** | **QTL Designation** | **Novel?** |
| --- | --- | --- | --- | --- | --- | --- | --- | --- |
| 1A | Schr1A_501900840 | 501,900,840 | height (A) | 16.37 | 2 | 2022, BLUE_AGRO | QHt.fgl-1A* | NOVEL |
| 1C | Schr1C_14889433 | 14,889,433 | height (A) | 15.97 | 2 | 2022, BLUE | QHt.fgl-1C |  |
| 1C | Schr1C_421064461 | 421,064,461 | Ca (M); plumps (A) | 10.38 | 2 | BLUE_AGRO, BLUE_MINERALS | QCa.fgl-1C*; QPlp.fgl-1C* | NOVEL |
| 2A | Schr2A_127027727 | 127,027,727 | Al (HM); As (HM); K (M); Mg (M); Ni (HM) | 37.84 | 2 | 2021, BLUE_MINERALS | QAl.fgl-2A*; QAs.fgl-2A*; QK.fgl-2A*; QMg.fgl-2A*; QNi.fgl-2A* | NOVEL |
| 2A | Schr2A_415387904 | 415,387,904 | twt (A) | 16.11 | 2 | 2020, BLUE_AGRO | QTwt.fgl-2A |  |
| 2C | Schr2C_21439604 | 21,439,604 | Cd (HM) | 20.82 | 2 | 2021, BLUE_MINERALS | QCd.fgl-2C* | NOVEL |
| 3A | Schr3A_318001437 | 318,001,437 | BetaGlucan (Q); plumps (A); thins (A) | 10.22 | 3 | 2021, 2022, BLUE_AGRO | QBg.fgl-3A; QPlp.fgl-3A*; QThn.fgl-3A | NOVEL |
| 3A | Schr3A_338284803 | 338,284,803 | P (M); Protein (Q) | 12.56 | 3 | 2021, 2022, BLUE_MINERALS | QP.fgl-3A*; QPro.fgl-3A | NOVEL |
| 3A | Schr3A_374688686 | 374,688,686 | Protein (Q); thins (A) | 10.27 | 2 | 2020, BLUE_AGRO | QPro.fgl-3A; QThn.fgl-3A |  |
| 3C | Schr3C_94030798 | 94,030,798 | Pb (HM) | 6.71 | 2 | 2021, BLUE_MINERALS | QPb.fgl-3C* | NOVEL |
| 3C | Schr3C_572155182 | 572,155,182 | P (M) | 6.96 | 2 | 2022, BLUE_MINERALS | QP.fgl-3C* | NOVEL |
| 4A | Schr4A_353846131 | 353,846,131 | Oil (Q) | 11.64 | 2 | 2022, BLUE_AGRO | QOil.fgl-4A* | NOVEL |
| 4A | Schr4A_378833513 | 378,833,513 | Cr (HM) | 9.28 | 2 | 2021, BLUE_MINERALS | QCr.fgl-4A* | NOVEL |
| 4A | Schr4A_378945405 | 378,945,405 | Cr (HM) | 14.22 | 2 | 2021, BLUE_MINERALS | QCr.fgl-4A* | NOVEL |
| 4A | Schr4A_461016628 | 461,016,628 | height (A) | 11.26 | 2 | 2022, BLUE_AGRO | QHt.fgl-4A |  |
| 4C | Schr4C_80680226 | 80,680,226 | Cr (HM) | 8.94 | 2 | 2021, BLUE_MINERALS | QCr.fgl-4C* | NOVEL |
| 4C | Schr4C_86729410 | 86,729,410 | height (A) | 7.06 | 2 | 2022, BLUE_AGRO | QHt.fgl-4C* | NOVEL |
| 4C | Schr4C_100116574 | 100,116,574 | Fe (M); Protein (Q) | 9.35 | 2 | BLUE_AGRO, BLUE_MINERALS | QFe.fgl-4C*; QPro.fgl-4C | NOVEL |
| 4D | Schr4D_16210031 | 16,210,031 | Fe (M); Mg (M); Ni (HM) | 14.53 | 2 | 2021, BLUE_MINERALS | QFe.fgl-4D*; QMg.fgl-4D*; QNi.fgl-4D* | NOVEL |
| 4D | Schr4D_302976703 | 302,976,703 | Se (M); Zn (M) | 7.08 | 2 | 2021, BLUE_MINERALS | QSe.fgl-4D*; QZn.fgl-4D* | NOVEL |
| 4D | Schr4D_448709273 | 448,709,273 | plumps (A) | 8.27 | 2 | 2022, BLUE_AGRO | QPlp.fgl-4D |  |
| 4D | Schr4D_454967583 | 454,967,583 | Na (M); Oil (Q); plumps (A) | 33.33 | 3 | 2022, BLUE_AGRO, BLUE_MINERALS | QNa.fgl-4D*; QOil.fgl-4D*; QPlp.fgl-4D | NOVEL |
| 5A | Schr5A_5527708 | 5,527,708 | HDDT (A); yield (A) | 7.54 | 2 | 2022, BLUE_AGRO | QHd.fgl-5A; QYld.fgl-5A |  |
| 5C | Schr5C_158661577 | 158,661,577 | As (HM); Co (M); Mg (M); Pb (HM) | 16.01 | 2 | 2021, BLUE_MINERALS | QAs.fgl-5C*; QCo.fgl-5C*; QMg.fgl-5C*; QPb.fgl-5C* | NOVEL |
| 5C | Schr5C_189880337 | 189,880,337 | height (A); thins (A) | 10.25 | 2 | 2021, BLUE_AGRO | QHt.fgl-5C; QThn.fgl-5C |  |
| 5C | Schr5C_516187131 | 516,187,131 | HDDT (A) | 10.16 | 2 | 2020, BLUE_AGRO | QHd.fgl-5C |  |
| 5C | Schr5C_516956660 | 516,956,660 | plumps (A) | 13.86 | 2 | 2022, BLUE_AGRO | QPlp.fgl-5C |  |
| 5D | Schr5D_112640709 | 112,640,709 | Al (HM); Ca (M) | 16.67 | 2 | 2021, BLUE_MINERALS | QAl.fgl-5D*; QCa.fgl-5D* | NOVEL |
| 5D | Schr5D_360183461 | 360,183,461 | Cd (HM) | 12.1 | 2 | 2021, BLUE_MINERALS | QCd.fgl-5D* | NOVEL |
| 6A | Schr6A_410017842 | 410,017,842 | plumps (A) | 6.52 | 2 | 2022, BLUE_AGRO | QPlp.fgl-6A |  |
| 6A | Schr6A_413089340 | 413,089,340 | Oil (Q) | 10.86 | 3 | 2020, 2022, BLUE_AGRO | QOil.fgl-6A |  |
| 6A | Schr6A_424502998 | 424,502,998 | Oil (Q) | 10.58 | 2 | 2021, BLUE_AGRO | QOil.fgl-6A |  |
| 6C | Schr6C_27440494 | 27,440,494 | thins (A) | 9.46 | 2 | 2020, BLUE_AGRO | QThn.fgl-6C |  |
| 6C | Schr6C_464659747 | 464,659,747 | plumps (A); thins (A); yield (A) | 10.82 | 2 | 2020, BLUE_AGRO | QPlp.fgl-6C; QThn.fgl-6C; QYld.fgl-6C |  |
| 6C | Schr6C_544406519 | 544,406,519 | As (HM); HDDT (A); Mg (M) | 11.78 | 2 | BLUE_AGRO, BLUE_MINERALS | QAs.fgl-6C*; QHd.fgl-6C; QMg.fgl-6C* | NOVEL |
| 6C | Schr6C_575691025 | 575,691,025 | yield (A) | 7.45 | 2 | 2020, BLUE_AGRO | QYld.fgl-6C |  |
| 7A | Schr7A_86310039 | 86,310,039 | Ca (M); plumps (A) | 7.51 | 2 | BLUE_AGRO, BLUE_MINERALS | QCa.fgl-7A*; QPlp.fgl-7A | NOVEL |
| 7A | Schr7A_311849469 | 311,849,469 | twt (A) | 10.6 | 2 | 2022, BLUE_AGRO | QTwt.fgl-7A* | NOVEL |
| 7D | Schr7D_1426333 | 1,426,333 | Na (M) | 6.64 | 2 | 2022, BLUE_MINERALS | QNa.fgl-7D* | NOVEL |

*Yellow-highlighted rows indicate novel QTL associated with mineral or heavy-metal traits not previously reported in oat GWAS. QTL are designated using the convention Qtrait.fgl-Chr#. Stab. = number of analyses in which the SNP reached Bonferroni significance. A = agronomic; Q = quality; M = mineral; HM = heavy metal.*

**Table 3.** Pleiotropic genomic regions associated with multiple traits. Regions are ordered by number of associated traits (descending) and maximum stability.

| **QTL Region** | **Chr** | **Position (Mb)** | **Key SNP** | **N SNPs** | **Associated Traits** | **Total Traits** | **Trait Categories** | **Max Stab.** | **Pleiotropy Type** |
| --- | --- | --- | --- | --- | --- | --- | --- | --- | --- |
| **QTL-1** | 2A | 127.03 | Schr2A_127027727 | 1 | Al (HM); As (HM); K (M); Mg (M); Ni (HM) | **5** | HM, M | **2** | Within-analysis |
| **QTL-2** | 5C | 158.66 | Schr5C_158661577 | 1 | As (HM); Co (M); Mg (M); Pb (HM) | **4** | HM, M | **2** | Within + Cross |
| **QTL-3** | 5D | 112.64 | Schr5D_112640709 | 2 | Al (HM); As (HM); Ca (M); Zn (M) | **4** | HM, M | **2** | Within + Cross |
| **QTL-4** | 3A | 318.00 | Schr3A_318001437 | 1 | BetaGlucan (Q); plumps (A); thins (A) | **3** | A, Q | **3** | Within + Cross |
| **QTL-5** | 4D | 454.97 | Schr4D_454967583 | 1 | Na (M); Oil (Q); plumps (A) | **3** | A, M, Q | **3** | Within + Cross |
| **QTL-6** | 4D | 16.21 | Schr4D_16210031 | 1 | Fe (M); Mg (M); Ni (HM) | **3** | HM, M | **2** | Within-analysis |
| **QTL-7** | 6C | 464.66 | Schr6C_464659747 | 1 | plumps (A); thins (A); yield (A) | **3** | A | **2** | Within-analysis |
| **QTL-8** | 6C | 544.41 | Schr6C_544406519 | 1 | As (HM); HDDT (A); Mg (M) | **3** | A, HM, M | **2** | Within + Cross |
| **QTL-9** | 3A | 338.28 | Schr3A_338284803 | 1 | P (M); Protein (Q) | **2** | M, Q | **3** | Cross-analysis |
| **QTL-10** | 1C | 421.06 | Schr1C_421064461 | 1 | Ca (M); plumps (A) | **2** | A, M | **2** | Cross-analysis |
| **QTL-11** | 3A | 374.69 | Schr3A_374688686 | 1 | Protein (Q); thins (A) | **2** | A, Q | **2** | Cross-analysis |
| **QTL-12** | 4C | 100.12 | Schr4C_100116574 | 1 | Fe (M); Protein (Q) | **2** | M, Q | **2** | Cross-analysis |
| **QTL-13** | 4D | 302.98 | Schr4D_302976703 | 1 | Se (M); Zn (M) | **2** | M | **2** | Cross-analysis |
| **QTL-14** | 5A | 5.53 | Schr5A_5527708 | 1 | HDDT (A); yield (A) | **2** | A | **2** | Cross-analysis |
| **QTL-15** | 5C | 189.88 | Schr5C_189880337 | 1 | height (A); thins (A) | **2** | A | **2** | Cross-analysis |
| **QTL-16** | 7A | 86.31 | Schr7A_86310039 | 1 | Ca (M); plumps (A) | **2** | A, M | **2** | Cross-analysis |
| **QTL-17** | 1A | 474.10 | Schr1A_474102039 | 1 | As (HM); Fe (M) | **2** | HM, M | **1** | Within-analysis |
| **QTL-18** | 3C | 36.53 | Schr3C_36532973 | 1 | K (M); Mg (M) | **2** | M | **1** | Within-analysis |
| **QTL-19** | 5C | 489.76 | Schr5C_489760537 | 1 | Fe (M); Se (M) | **2** | M | **1** | Within-analysis |
| **QTL-20** | 6A | 70.86 | Schr6A_70864706 | 1 | Oil (Q); thins (A) | **2** | A, Q | **1** | Within-analysis |
| **QTL-21** | 6C | 35.01 | Schr6C_35009490 | 1 | Mo (M); Zn (M) | **2** | M | **1** | Within-analysis |
| **QTL-22** | 7C | 151.86 | Schr7C_151862414 | 1 | plumps (A); thins (A) | **2** | A | **1** | Within-analysis |
| **QTL-23** | 7D | 521.26 | Schr7D_521262808 | 1 | Cd (HM); HDDT (A) | **2** | A, HM | **1** | Within-analysis |

*Green-shaded rows indicate major pleiotropic hubs (≥3 associated traits). Trait category abbreviations: A = Agronomic, Q = Quality, M = Mineral, HM = Heavy Metal. Max Stab. = maximum number of GWAS analyses (out of 5) in which the key SNP reached Bonferroni significance. N SNPs = number of Bonferroni-pleiotropic SNPs within the QTL region.*
